# Supplementary material for: In situ encapsulation engineering boosts the electrochemical performance of highly graphitized N-doped porous carbon-based copper–cobalt selenides for bifunctional oxygen electrocatalysis
Source: Royal Society of Chemistry journal article supplement (doi:10.1039/d1nr05125c), 2021-01-01
Supplement: d1nr05125c1.pdf [file d1nr05125c1.pdf]

## Supplementary Information

### **In-situ encapsulation engineering boosts electrochemical performance of highly graphitized N-doped porous carbon-based copper-cobalt selenides for bifunctional oxygen electrocatalysis**

Hang Zhang,<sup>a,b</sup> Xuemin Wang,<sup>b,c,d</sup> Zhengzheng Li,<sup>\*a</sup> Cui Zhang,<sup>\*b,c,d</sup> and Shuangxi Liu<sup>\*b,c,d,e</sup>

<sup>a</sup> College of Chemical Engineering and Materials Science, Tianjin University of Science & Technology, Tianjin 300457, PR China. E-mail: li.z.z@tust.edu.cn

<sup>b</sup> Institute of New Catalytic Materials Science, School of Materials Science and Engineering, Nankai University, Tianjin 300350, PR China. E-mail: zhangcui@nankai.edu.cn; sliu@nankai.edu.cn

<sup>c</sup> National Institute of Advanced Materials, Nankai University, Tianjin 300350, PR China.

<sup>d</sup> Tianjin Collaborative Innovation Center for Chemistry & Chemical Engineering, Tianjin 300072, PR China.

<sup>e</sup> Key Laboratory of Advanced Energy Materials Chemistry, Ministry of Education, Nankai University, Tianjin 300071, PR China.

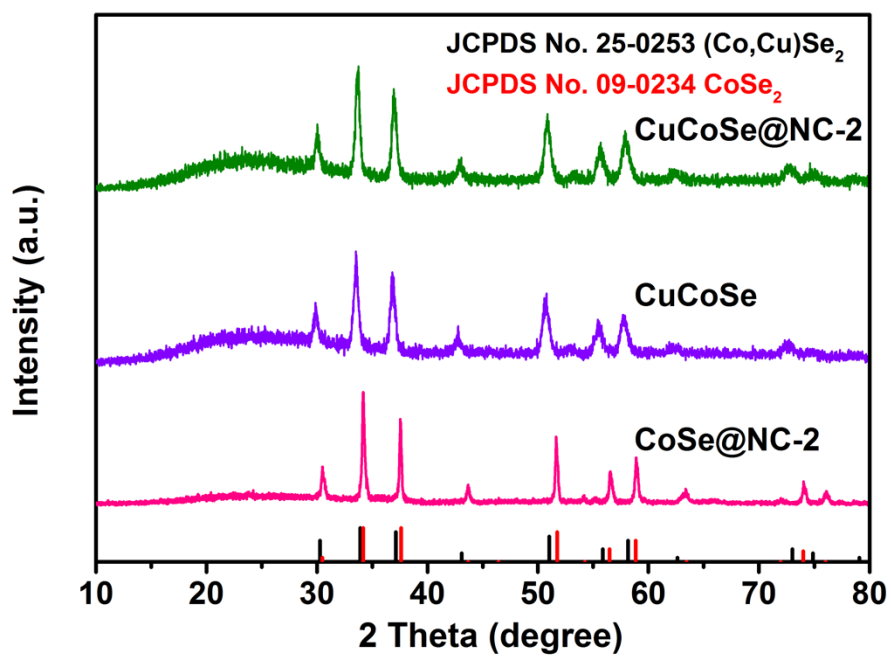

Fig. S1. XRD patterns of CuCoSe@NC-2, CuCoSe and CoSe@NC-2.

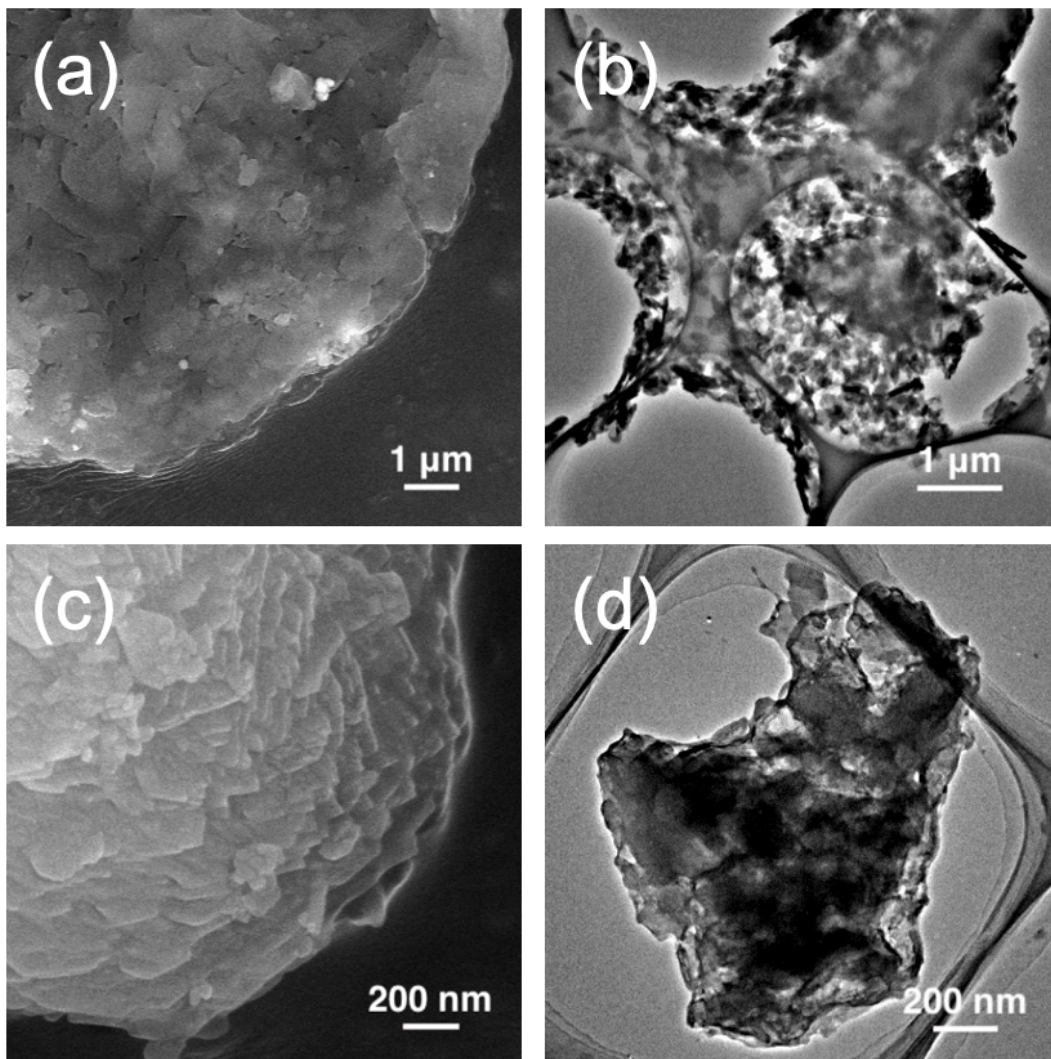

**Fig. S2.** SEM and TEM images of (a, b) CuCo-BDC and (c, d) CuCo-BDC-2@2-MIM.

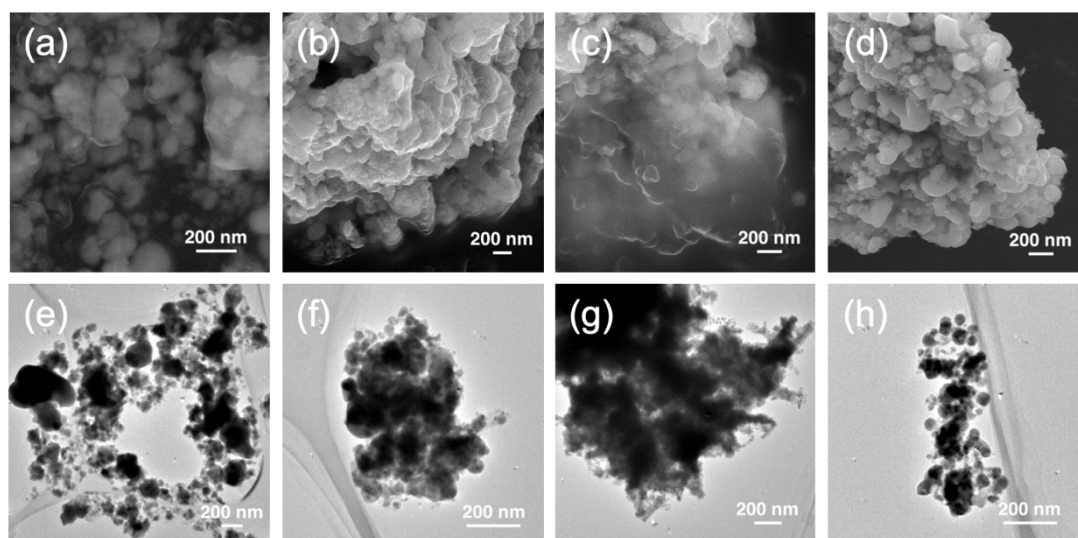

**Fig. S3.** SEM and TEM images of (a, e) CuCoSe@NC-1, (b, f) CuCoSe@NC-3, (c, g) CoSe@NC-2 and (d, h) CuCoSe.

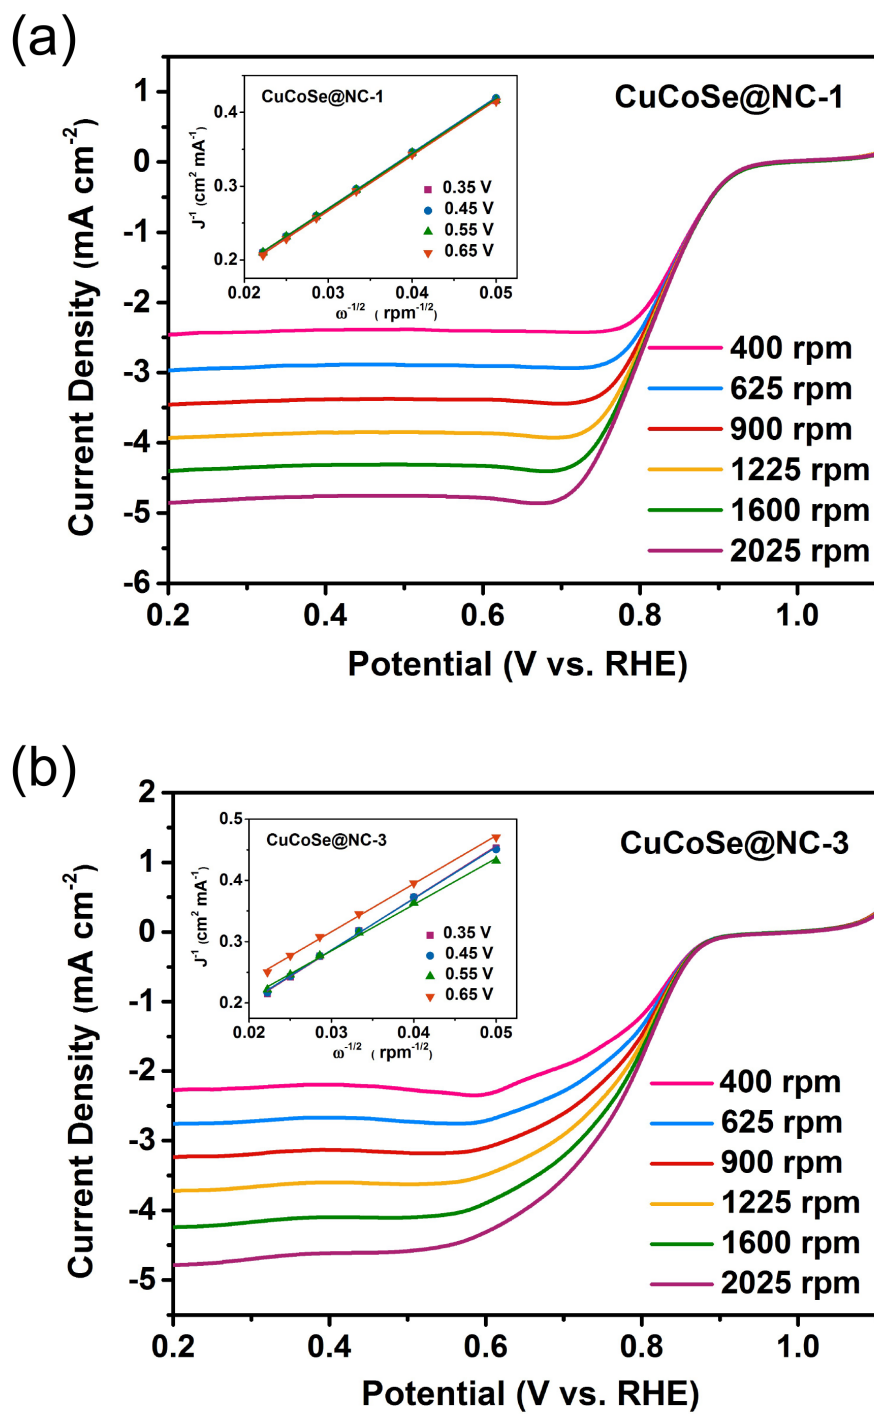

**Fig. S4.** ORR polarization curves of (a) CuCoSe@NC-1 and (b) CuCoSe@NC-3 measured at different rotating speeds in 0.1 M KOH solution and the corresponding K-L plots at different potentials (inset).

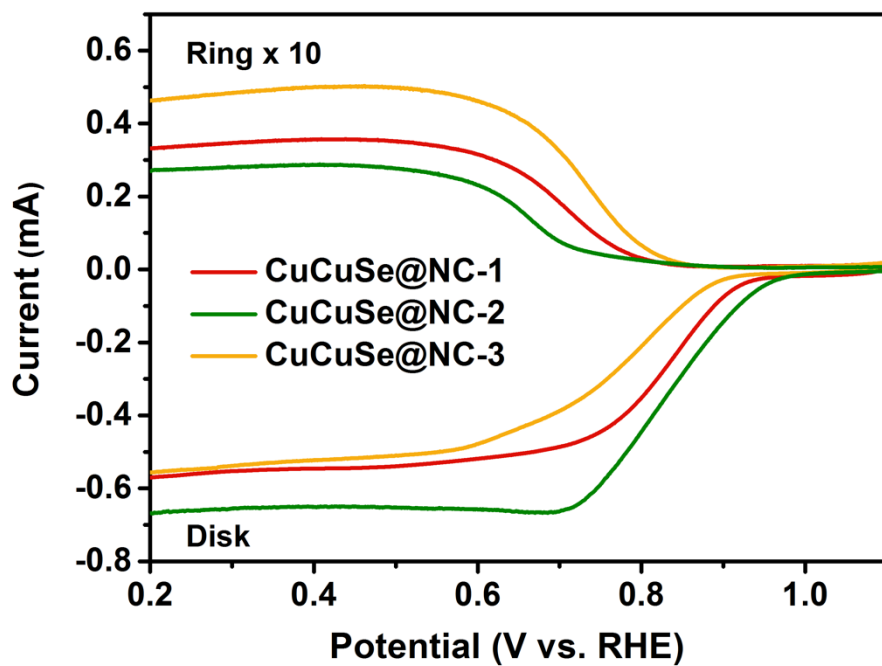

**Fig. S5.** RRDE voltammograms and amperometric responses of CuCuSe@NC-x at a scan rate of 10 mV s<sup>-1</sup> and a rotating speed of 1600 rpm in O<sub>2</sub> saturated 0.1 M KOH solution.

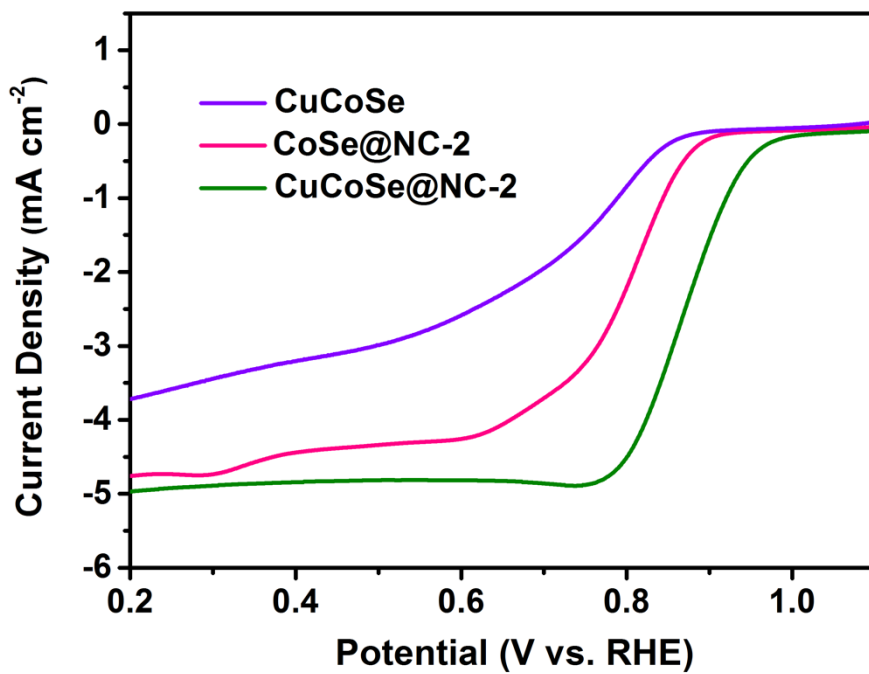

**Fig. S6.** LSV curves of CuCoSe, CoSe@NC-2 and CuCoSe@NC-2 at a rotating speed of 1600 rpm in O<sub>2</sub>-saturated 0.1 M KOH solution.

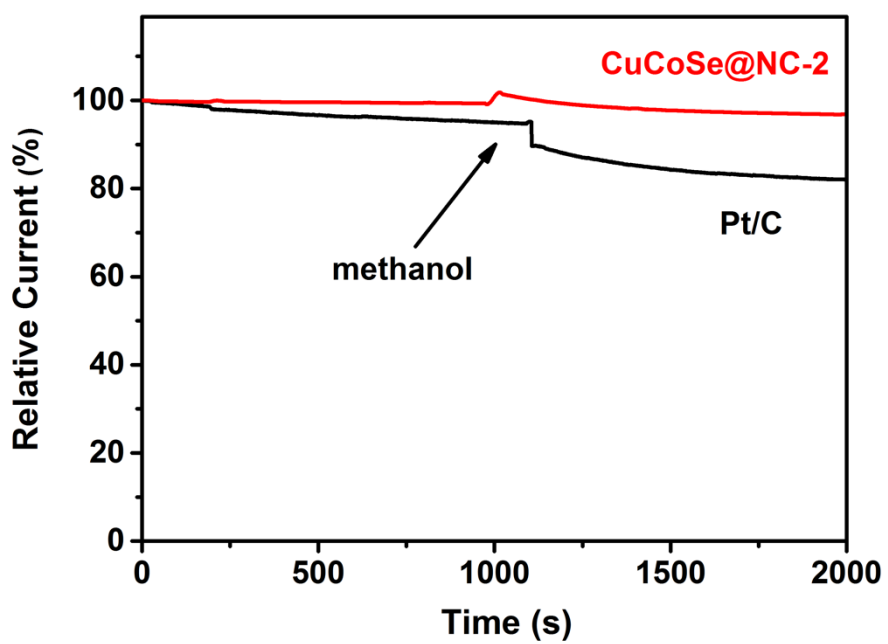

**Fig. S7.** *I-t* plots of CuCoSe@NC-2 and Pt/C for the evaluation of anti-methanol poisoning performance.



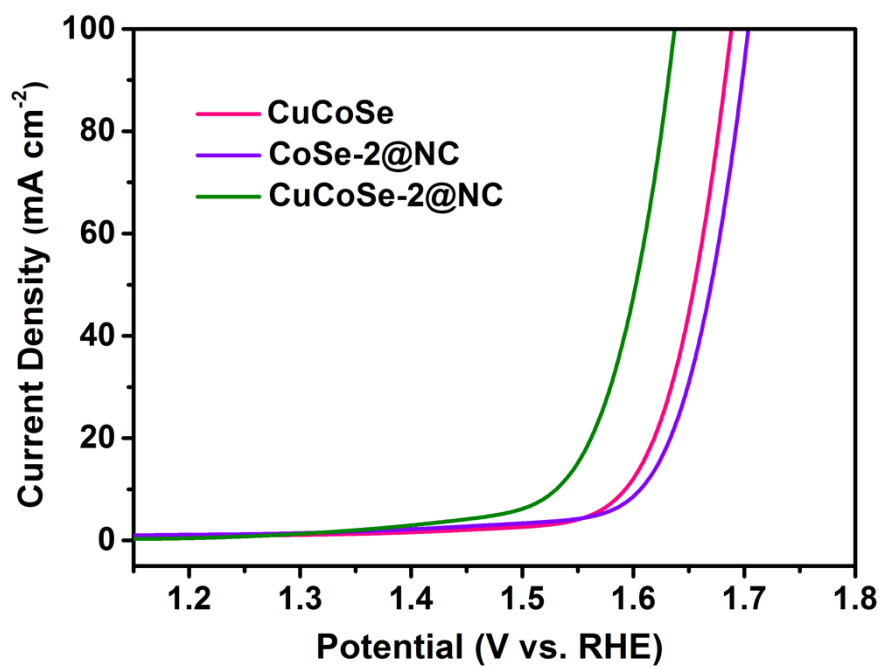

**Fig. S8.** LSV curves of CuCoSe, CoSe@NC-2 and CuCoSe@NC-2 in 1 M KOH solution toward the OER.

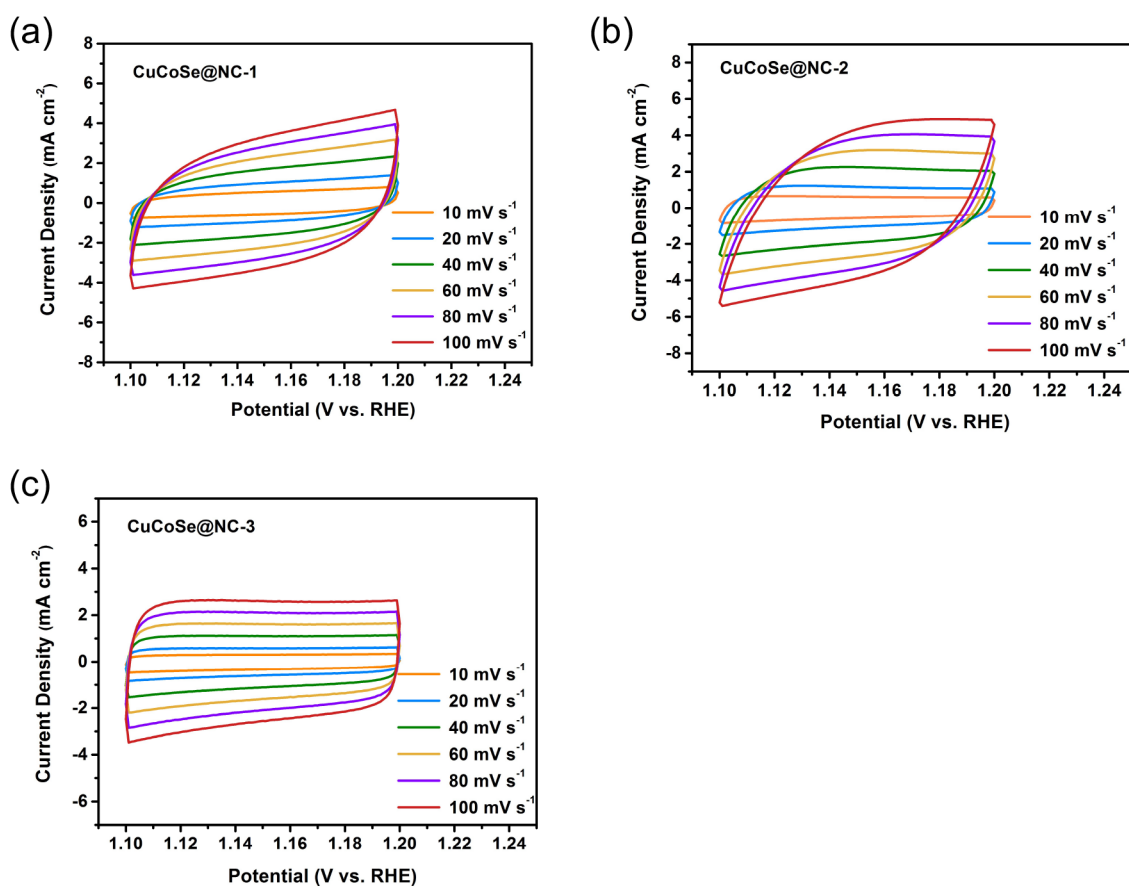

**Fig. S9.** CV curves of CuCoSe@NC-1, CuCoSe@NC-2 and CuCoSe@NC-3 at different scan rates in 1 M KOH solution.

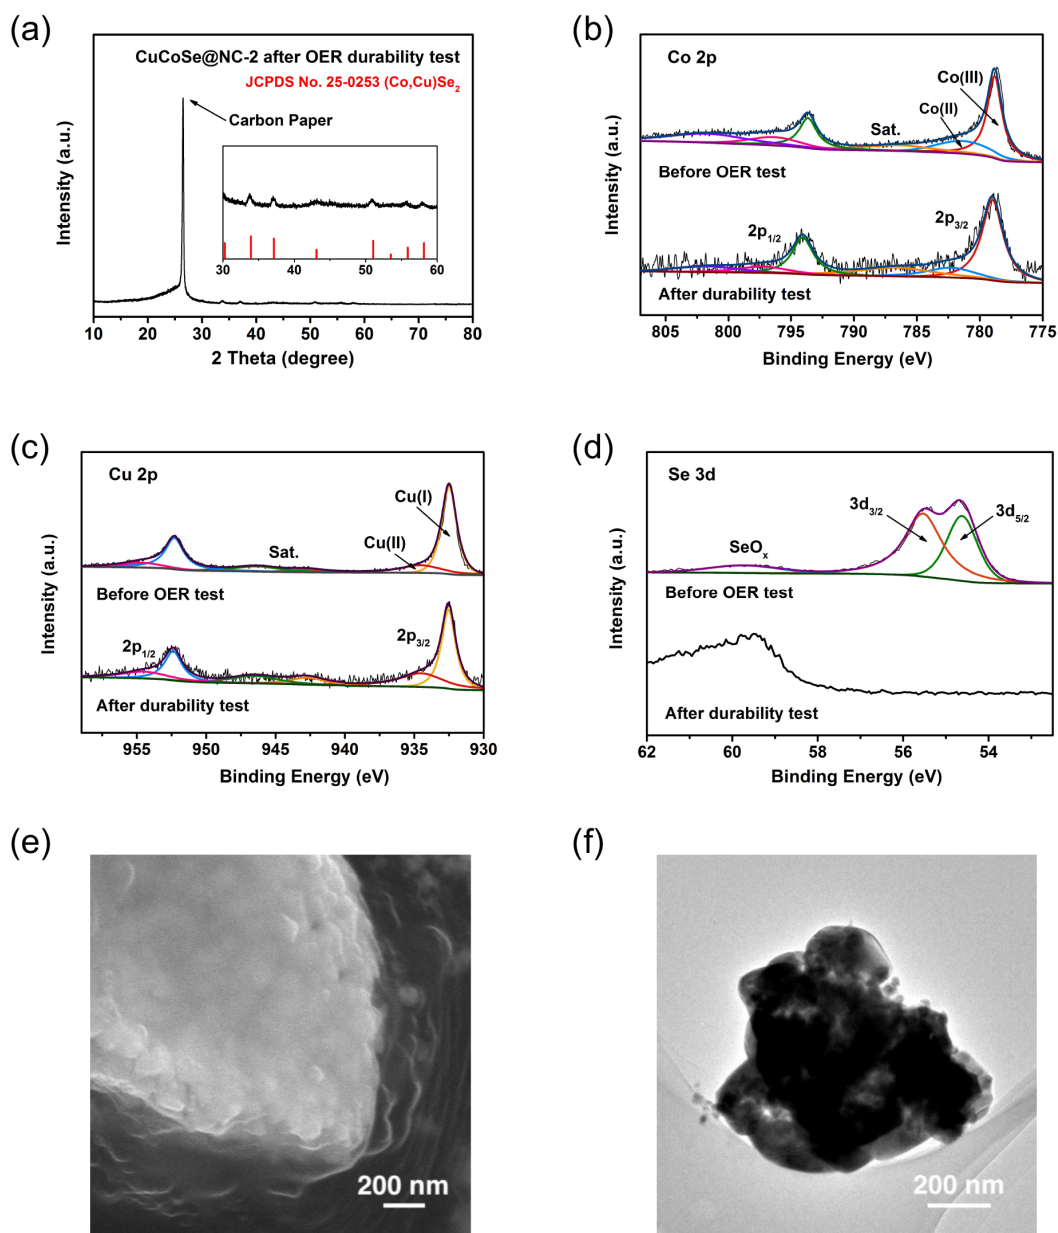

**Fig. S10.** (a) XRD spectrum of CuCoSe@NC-2 after OER durability test. XPS spectra for (b) Co 2p, (c) Cu 2p and (d) S 2p of CuCoSe@NC-2 before and after OER durability test. (e) SEM image and (f) TEM image of CuCoSe@NC-2 after OER durability test.

**Table S1.** The BET specific surface area of CuCoSe@NC-*x*.

| Samples     | $S_{\text{BET}}$ (m <sup>2</sup> g <sup>-1</sup> ) |
|-------------|----------------------------------------------------|
| CuCoSe@NC-1 | 226                                                |
| CuCoSe@NC-2 | 342                                                |
| CuCoSe@NC-3 | 169                                                |

**Table S2.** Comparison of the ORR performance of CuCoSe@NC-2 and other metal selenide electrocatalysts reported in the literature.

| Samples                                                | Electrolyte | Onset Potentials<br>(V vs. RHE) | Half-wave Potentials<br>(V vs. RHE) | References                                                         |
|--------------------------------------------------------|-------------|---------------------------------|-------------------------------------|--------------------------------------------------------------------|
| CuCoSe@NC-2                                            | 0.1 M KOH   | 0.951                           | 0.846                               | <b>This work</b>                                                   |
| Co <sub>0.85</sub> Se@CNFs                             | 0.1 M KOH   | 0.84                            | 0.82                                | <i>Chem. Eur. J.</i> ,<br>2019, 25: 1-8                            |
| Ni <sub>x</sub> Co <sub>0.85-x</sub> Se                | 0.1 M KOH   | 0.89                            | 0.82                                | <i>Sci. China Mater.</i> ,<br>2020, 63(3): 347-<br>355             |
| (Ni,Co)Se <sub>2</sub>                                 | 0.1 M KOH   | /                               | 0.70                                | <i>Journal of Energy<br/>Chemistry</i> , 2019,<br>38: 34-40        |
| Co-Fe-P-Se/NC                                          | 0.1 M KOH   | /                               | 0.76                                | <i>Nanoscale</i> , 2019,<br>11(42): 20144-<br>20150                |
| Co <sub>0.62</sub> Zn <sub>0.38</sub> -<br>ZIF@NCF-800 | 0.1 M KOH   | 0.913                           | 0.78                                | <i>ACS Sustainable<br/>Chem. Eng.</i> ,<br>2020, 8, 8391-<br>8401  |
| CoIn <sub>2</sub> Se <sub>4</sub>                      | 0.1 M KOH   | 0.88                            | 0.77                                | <i>ACS Appl. Mater.<br/>Interfaces</i> , 2020,<br>12(7): 8115-8123 |
| Cu-14-Co <sub>3</sub> Se <sub>4</sub> /GC              | 0.1 M KOH   | 0.892                           | 0.782                               | <i>ACS Catal.</i> , 2019,<br>9(12): 10761-<br>10772                |
| Ni <sub>0.85</sub> Se-NHCS                             | 0.1 M KOH   | 0.850                           | /                                   | <i>J. Mater. Sci.</i> ,<br>2019, 54(12):<br>9063-9074              |

**Table S3.** Comparison of the OER performance of CuCoSe@NC-2 and other metal selenide electrocatalysts reported in the literature.

| Samples                                   | Electrolyte | Overpotentials at 10 mA cm <sup>-2</sup> (mV) | References                                                    |
|-------------------------------------------|-------------|-----------------------------------------------|---------------------------------------------------------------|
| CuCoSe@NC-2                               | 1.0 M KOH   | 300                                           | <b>This work</b>                                              |
| CoIn <sub>2</sub> Se <sub>4</sub>         | 1.0 M KOH   | 305                                           | <i>ACS Appl. Mater. Interfaces</i> , 2020, 12(7): 8115-8123   |
| Co <sub>0.85</sub> Se-NC/C-T              | 1.0 M KOH   | 298                                           | <i>Chemical Engineering Journal</i> , 2021, 420(15):130461    |
| Ni <sub>0.85</sub> Se-NHCS                | 1.0 M KOH   | 353                                           | <i>J. Mater. Sci.</i> , 2019, 54(12): 9063-9074               |
| Cu-14-Co <sub>3</sub> Se <sub>4</sub> /GC | 1.0 M KOH   | 280                                           | <i>ACS Catal.</i> , 2019, 9(12): 10761-10772                  |
| Ni <sub>x</sub> Co <sub>0.85-x</sub> Se   | 0.1 M KOH   | 305                                           | <i>Sci. China Mater.</i> , 2020, 63(3): 347-355               |
| (Ni,Co)Se <sub>2</sub>                    | 0.1 M KOH   | 360                                           | <i>Journal of Energy Chemistry</i> , 2019, 38: 34-40          |
| FeSe/NC-PoFeSe                            | 0.1 M KOH   | 350                                           | <i>ACS Appl. Mater. Interfaces</i> , 2018, 10(38):32133-32141 |

**Table S4.** Comparison of the Zn-air batteries performance of CuCoSe@NC-2 and other metal selenide electrocatalysts reported in the literature.

| Samples                                 | Power density<br>(mW cm <sup>-2</sup> ) | Durability @ J (mA cm <sup>-2</sup> ) | References                                                         |
|-----------------------------------------|-----------------------------------------|---------------------------------------|--------------------------------------------------------------------|
| CuCoSe@NC-2                             | 137.1                                   | Cycle times over 75 h @ 10            | <b>This work</b>                                                   |
| Ni <sub>x</sub> Co <sub>0.85-x</sub> Se | /                                       | Cycle times over 84 h @ 10            | <i>Sci. China Mater.</i> ,<br>2020, 63(3): 347-355                 |
| (Ni,Co)Se <sub>2</sub>                  | 110                                     | Cycle times over 120 h @ 2            | <i>Journal of Energy<br/>Chemistry</i> , 2019, 38:<br>34-40        |
| CoIn <sub>2</sub> Se <sub>4</sub>       | 107                                     | Cycle numbers over 410 @ 10           | <i>ACS Appl. Mater.<br/>Interfaces</i> , 2020,<br>12(7): 8115-8123 |
| Ni <sub>0.85</sub> Se-NHCS              | 89.41                                   | Cycle times over 18 h @ 20            | <i>J. Mater. Sci.</i> , 2019,<br>54(12): 9063-9074                 |
| Co-Fe-P-Se/NC                           | 104                                     | Cycle numbers over 120 @ 10           | <i>Nanoscale</i> , 2019,<br>11(42): 20144-20150                    |
| Ni-Fe-Se <sub>1:1</sub> -180            | 148.6                                   | Cycle times over 300 h @ 10           | <i>Electrochimica Acta</i> ,<br>2018, 291: 64-72.                  |
